# Supplementary material for: Empagliflozin Treatment Attenuates Hepatic Steatosis by Promoting White Adipose Expansion in Obese TallyHo Mice
Source: MDPI journal article supplement (doi:10.3390/ijms23105675), 2022-05-18
Supplement: s1 [file s1]

# Supplemental Figure S3

A

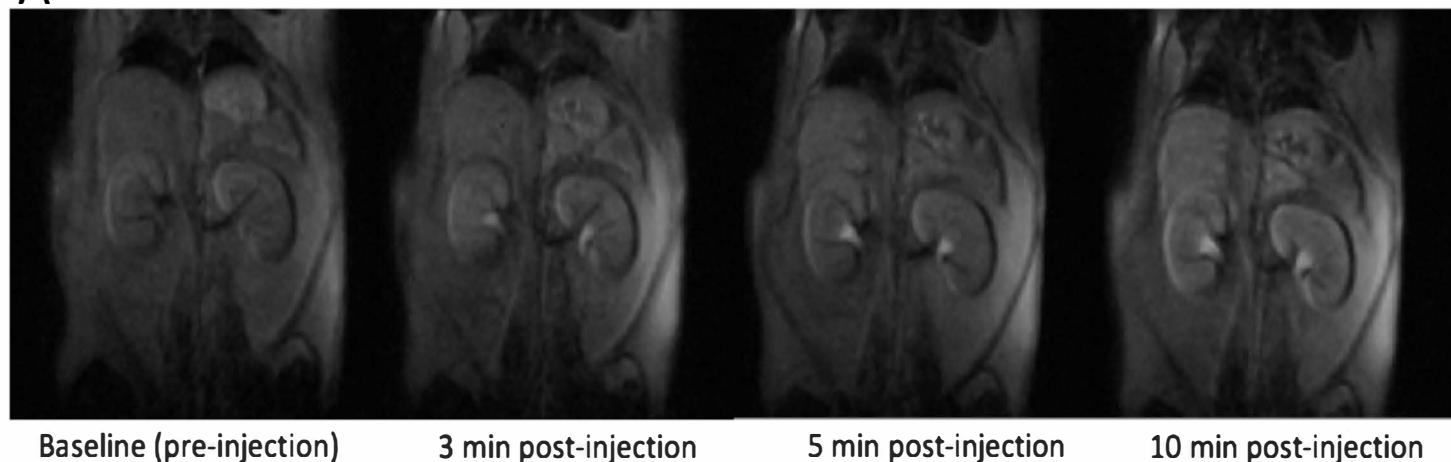

B

TallyHo Male

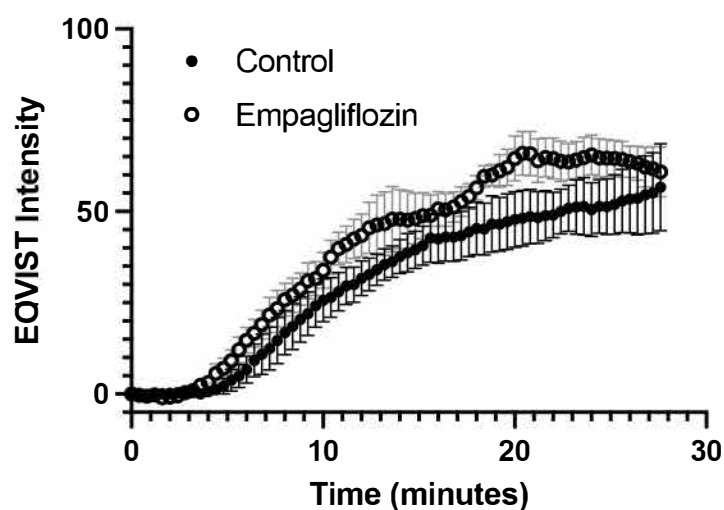

C

TallyHo Female

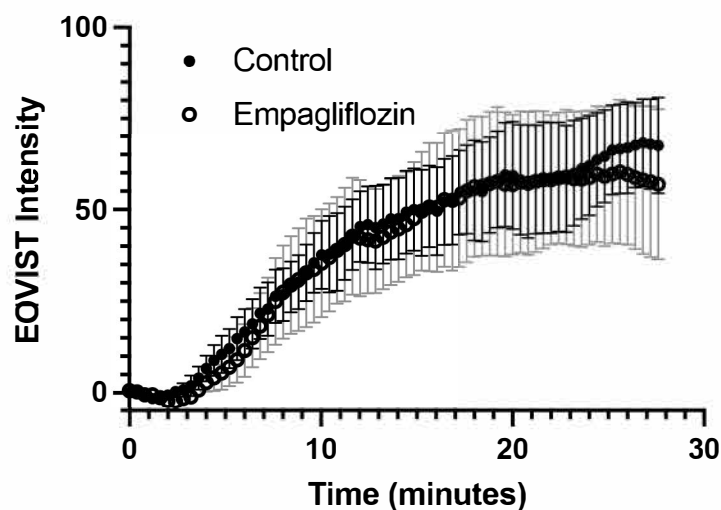

D

|                      | Maximum Intensity | Time to peak intensity (minutes) | K <sub>m</sub> (minutes) |
|----------------------|-------------------|----------------------------------|--------------------------|
| Male Control         | 67.6 ± 12.7       | 22.9 ± 1.6                       | 13.3 ± 0.6               |
| Male Empagliflozin   | 88.8 ± 3.6        | 25.0 ± 1.5                       | 12.8 ± 0.6               |
| Female Control       | 95.0 ± 9.7        | 22.7 ± 2.4                       | 13.4 ± 0.3               |
| Female Empagliflozin | 83.5 ± 23.7       | 24.7 ± 1.2                       | 13.3 ± 0.5               |
