# Supplementary figures and images for: Empagliflozin Treatment Attenuates Hepatic Steatosis by Promoting White Adipose Expansion in Obese TallyHo Mice
Source: MDPI journal article supplement (doi:10.3390/ijms23105675), 2022-05-18

# Supplemental Figure S2

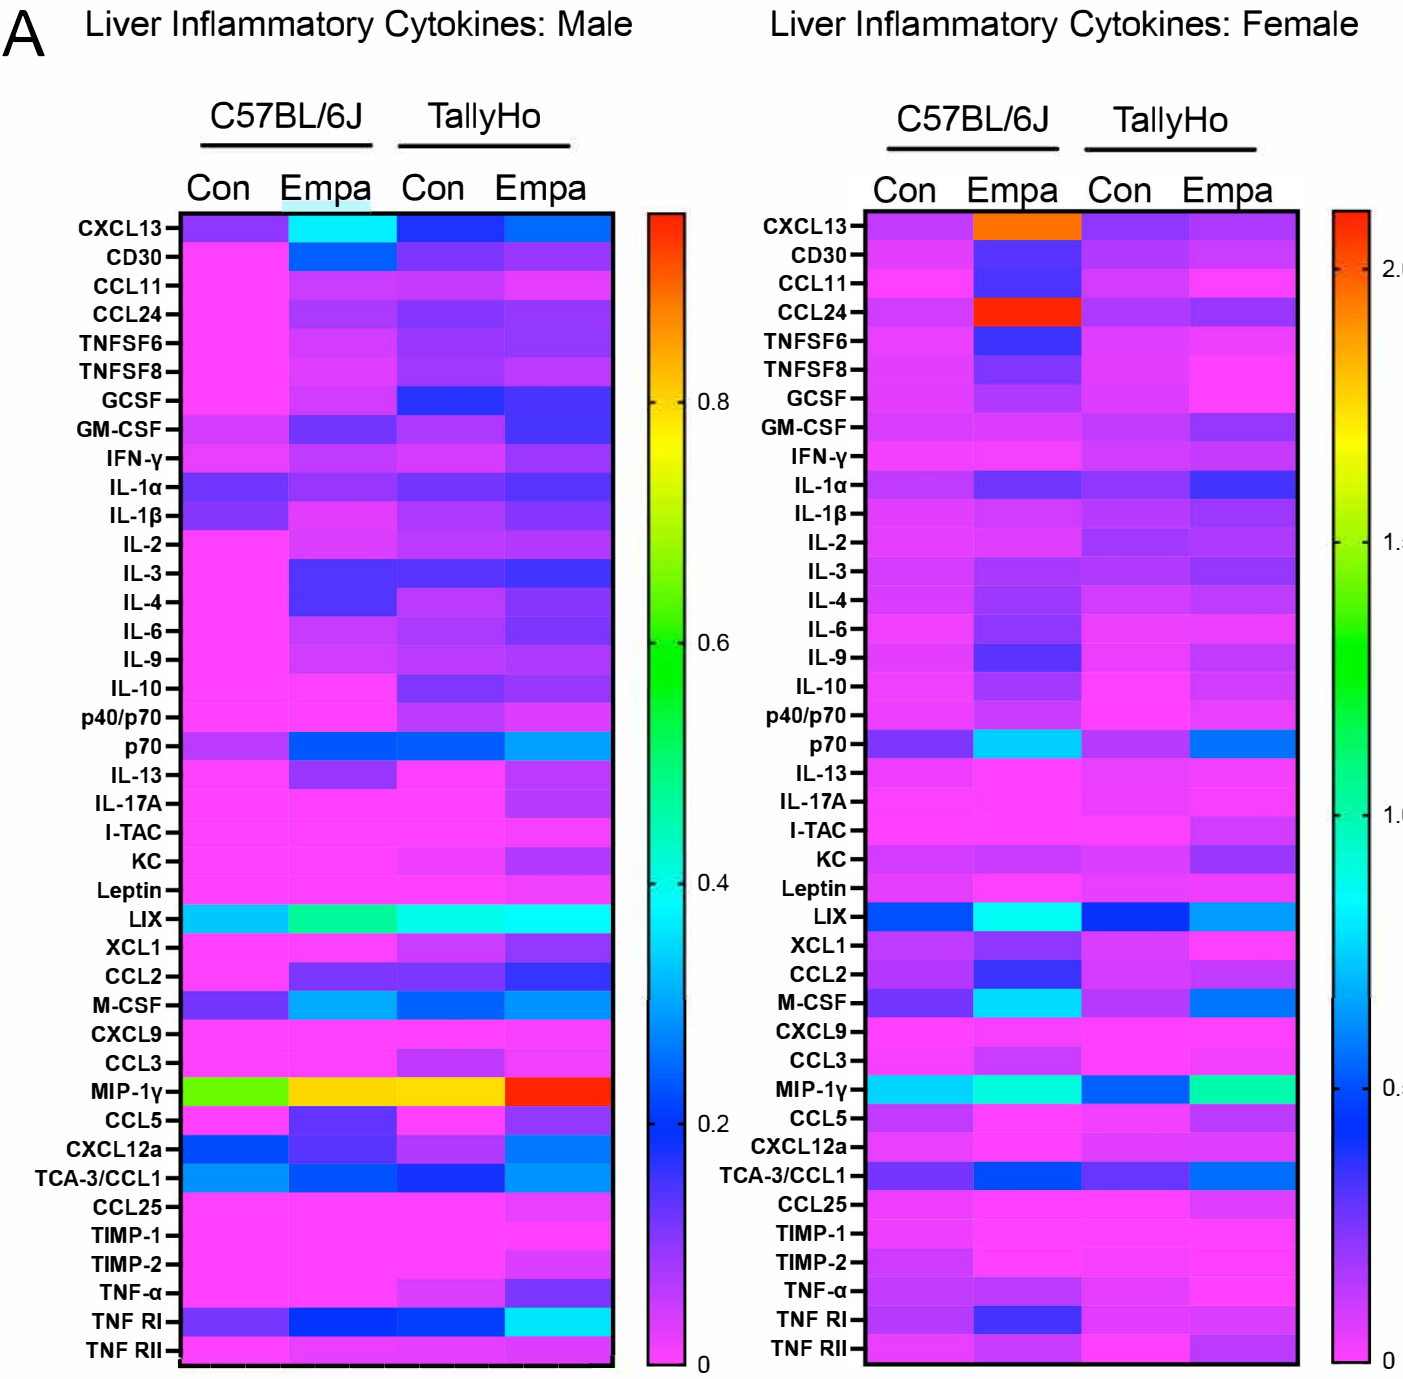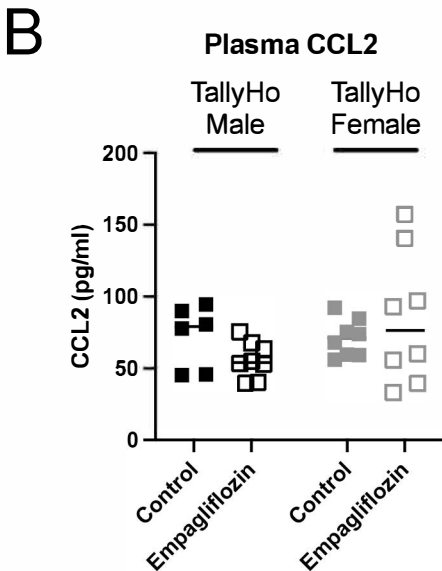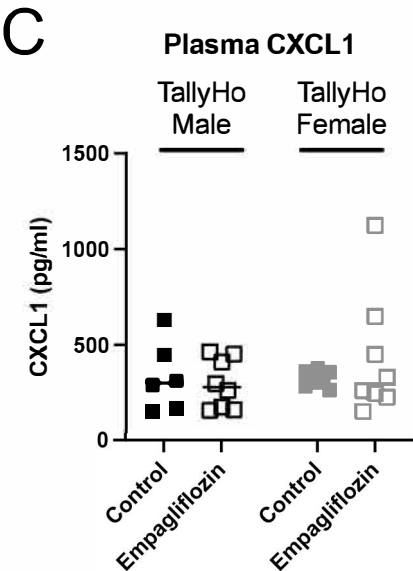

Supplement: s1 [file s1]

Supplemental Figure S1

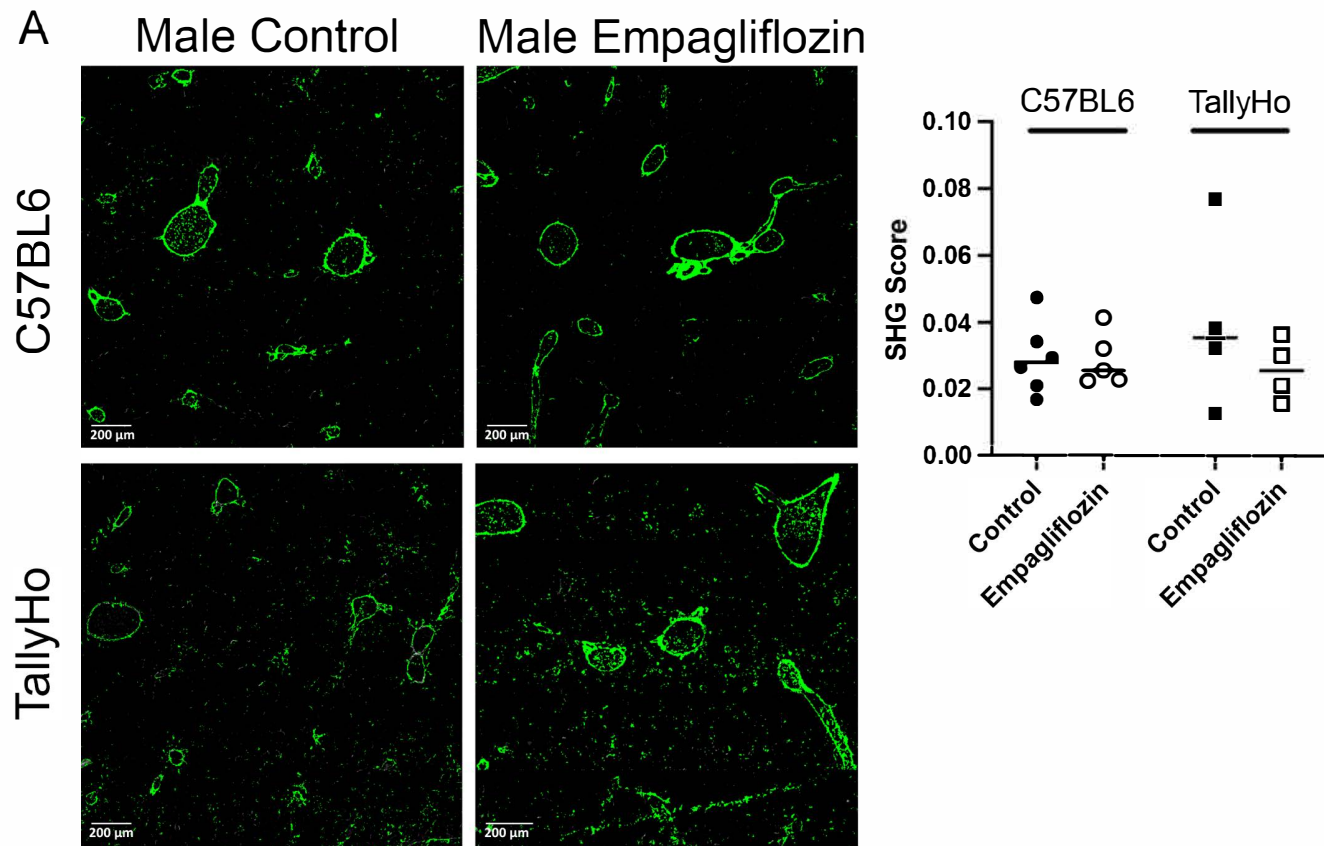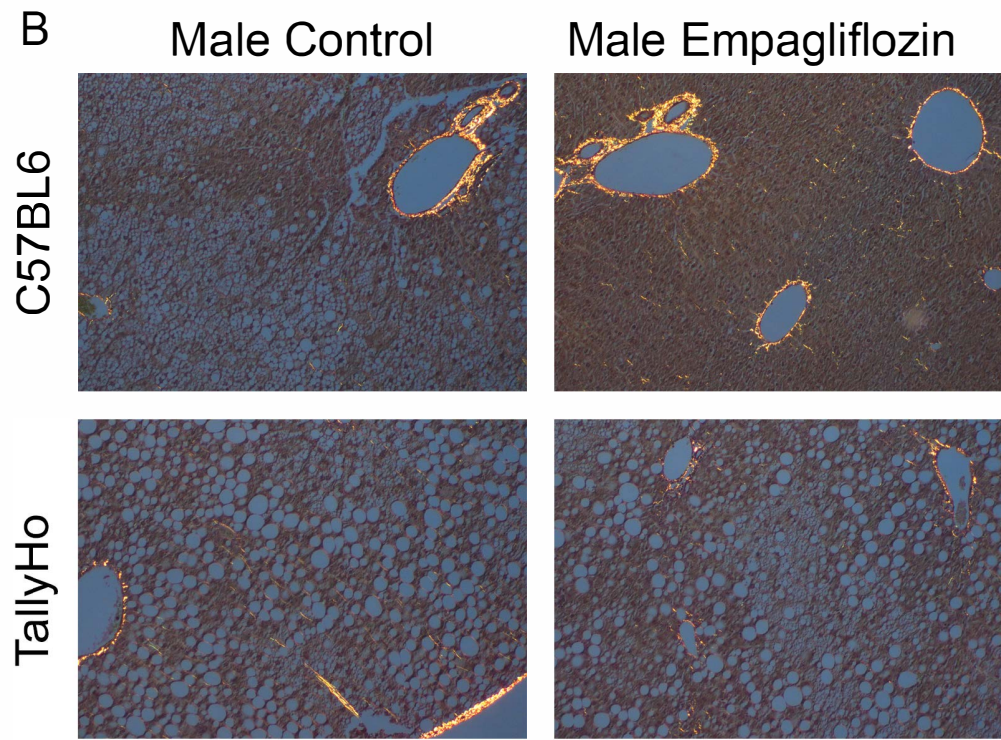

Supplement: s1 [file s1]
